# Supplementary material
Source: Springer Nature journal article supplement (https://www.springerprofessional.de/resource/supplementary/13638_2012_681_MOESM8_ESM.pdf/11898250)

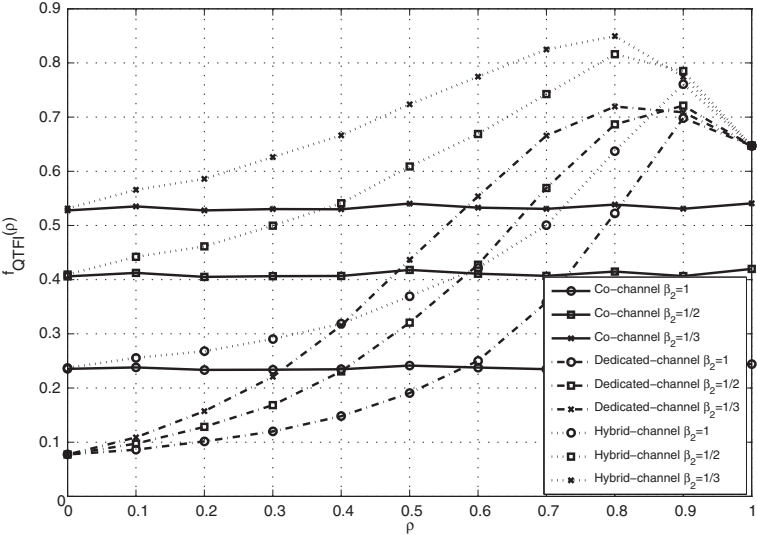

Supplement: MOESM8 [file 11898250]
